# Supplementary material
Source: publisher site journal article supplement (https://www.dovepress.com/article/523771)
Supplement: Supplementary file 1 [file 523771%20Revised%20Tables%20S1-S2.docx]

**Table S1. Factors affecting percentage of total weight loss（%TWL）**

| Factors | 1month | | 3months | | 6months | | 12months | |
| --- | --- | --- | --- | --- | --- | --- | --- | --- |
| r | P | r | P | r | P | r | P |
| Age, years | 0.089 | 0.182 | -0.003 | 0.965 | -0.071 | 0.363 | -0.034 | 0.705 |
| Sex, [Female, n%] | -0.115 | 0.083 | -0.135* | 0.045 | -0.041 | 0.601 | -0.187* | 0.037 |
| WHR | 0.014 | 0.893 | 0.027 | 0.695 | 0.037 | 0.642 | 0.173 | 0.058 |
| BMI (kg/m2) | -0.134* | 0.044 | 0.074 | 0.270 | 0.171* | 0.029 | 0.441** | <0.001 |
| DHS | -0.113 | 0.090 | -0.184** | 0.006 | -0.059 | 0.451 | -0.170 | 0.058 |
| MASH | -0.132* | 0.048 | -0.167* | 0.013 | -0.144 | 0.066 | 0.013 | 0.884 |
| UA (umol/L) | 0.029 | 0.667 | -0.033 | 0.623 | -0.004 | 0.957 | 0.080 | 0.373 |
| TG | 0.153* | 0.021 | 0.058 | 0.389 | 0.005 | 0.951 | 0.111 | 0.221 |
| Total cholesterol(mmol/L) | 0.028 | 0.679 | -0.044 | 0.517 | 0.048 | 0.541 | 0.164 | 0.069 |
| FFA (mmol/L) | -0.085 | 0.221 | -0.069 | 0.327 | -0.016 | 0.849 | 0.015 | 0.874 |
| A1C (%) | -0.019 | 0.788 | -0.078 | 0.245 | -0.100 | 0.204 | 0.011 | 0.900 |
| HOMA-IR | -0.082 | 0.217 | -0.022 | 0.741 | -0.001 | 0.989 | 0.146 | 0.104 |
| AST/ALT | -0.030 | 0.657 | 0.042 | 0.536 | -0.094 | 0.235 | -0.025 | 0.785 |
| HDL | -0.112 | 0.098 | -0.076 | 0.265 | -0.162* | 0.043 | -0.088 | 0.333 |
| LDL | -0.016 | 0.810 | -0.023 | 0.736 | 0.079 | 0.326 | 0.097 | 0.291 |
| T2D | -0.006 | 0.934 | 0.027 | 0.692 | 0.140 | 0.073 | 0.036 | 0.693 |
| HTN | -0.062 | 0.357 | -0.004 | 0.949 | 0.020 | 0.800 | -0.088 | 0.331 |
| MS | -0.090 | 0.177 | -0.034 | 0.617 | 0.076 | 0.335 | -0.081 | 0.367 |
| OSAHS | -0.046 | 0.495 | -0.052 | 0.438 | -0.063 | 0.426 | -0.164 | 0.068 |

%TWL: the percentage of total weight loss; WHR: Waist hip ratio; BMI: Body mass index; DHS: Degree of hepatic steatosis; MASH: Metabolic dysfunction associated steatohepatitis; UA: Uric acid; TG: Triglycerides; FFA: Free fatty acids; A1C: Glycated hemoglobin; HOMA-IR: Homeostatic model assessment of insulin resistance; AST: Aspartate transaminase; ALT: Alanine transaminase; HDL: High density lipoprotein; LDL: Low density lipoprotein; T2D: Type 2 diabetes mellitus; HTN: Hypertension; MS: Metabolic syndrome; OSAHS: Obstructive sleep apnea-hypopnea syndrome.
* P<0.05, ** P<0.01.

**Table S2. Multiple linear regression affecting postoperative (%TWL)**

| TWL | Factors | B | SE | β value | t | P value |
| --- | --- | --- | --- | --- | --- | --- |
| 1month | SEX | -0.010 | 0.004 | -0.177 | -2.433 | 0.016* |
| BMI | -0.001 | <0.001 | -0.126 | -1.744 | 0.083 |
| DHS | -0.005 | 0.002 | -0.159 | -2.115 | 0.036* |
| TG | 0.004 | 0.002 | 0.159 | 2.283 | 0.023* |
| HDL | -0.004 | 0.004 | -0.076 | -1.146 | 0.253 |
| 3month | SEX | -0.009 | 0.006 | -0.112 | -1.522 | 0.130 |
| BMI | 0.001 | <0.001 | 0.108 | 1.478 | 0.141 |
| DHS | -0.011 | 0.003 | -0.221 | -3.234 | 0.001** |
| TG | 0.004 | 0.002 | 0.104 | 1.494 | 0.137 |
| HDL | 0.003 | 0.005 | 0.038 | 0.563 | 0.574 |
| 6month | SEX | 0.005 | 0.010 | 0.042 | 0.462 | 0.645 |
| BMI | 0.001 | 0.001 | 0.193 | 2.156 | 0.033* |
| DHS | -0.007 | 0.005 | -0.109 | -1.342 | 0.181 |
| TG | 0.003 | 0.004 | 0.071 | 0.839 | 0.403 |
| HDL | -0.009 | 0.008 | -0.089 | -1.095 | 0.275 |
| 12month | SEX | 0.013 | 0.017 | 0.070 | 0.752 | 0.454 |
| BMI | 0.006 | 0.001 | 0.521 | 5.787 | <0.001*** |
| DHS | -0.019 | 0.009 | -0.167 | -2.073 | 0.040* |
| TG | 0.010 | 0.007 | 0.129 | 1.517 | 0.132 |
| HDL | -0.018 | 0.013 | -0.109 | -1.346 | 0.221 |

NOTE: 1month postoperative R2=0.080, adjusted R2=0.059，F=3.725 P=0.003,Y=0.177-0.010SEX-0.005*DHS+0.004* TG. 3months postoperative, R2=0.081, adjusted R2=0.059, F=3.684, P=0.003, Y=0.233-0.011*DHS; 6months R2=0.048, adjusted R2=0.017, F=1.530, P=0.184. Y=0.264+0.001*BMI; 12months R2=0.278, adjusted R2=0.247, F=8.926, P<0.001, Y=0.149+0.006*BMI-0.019*DHS.
%TWL: the percentage of total weight loss; BMI: Body mass index; DHS: Degree of hepatic steatosis; TG: Triglycerides.
* P<0.05, ** P<0.01, ***P<0.001.
